# Supplementary material for: Aluminum Exposure from Parenteral Nutrition: Early Bile Canaliculus Changes of the Hepatocyte
Source: PubMed Central journal article supplement (PMC6024673; doi:10.3390/nu10060723), 2018-06-04
Supplement: nutrients-10-00723-s001.pdf [file nutrients-10-00723-s001.pdf]

Table S1: Full TEM Measurements and ANOVA analysis.

|                                                                                 | High AI          | Standard AI       | Reference        | Difference (p value) |
|---------------------------------------------------------------------------------|------------------|-------------------|------------------|----------------------|
| <b>Canalicular Space</b>                                                        |                  |                   |                  |                      |
| Mean canalicular area (+/- SD) (microns <sup>2</sup> )                          | 1.96 (+/- 1.33)  | 2.88 (+/- 1.51)   | 1.47 (+/-0.66)   | p= 0.001             |
| Mean canalicular perimeter (+/- SD) (microns)                                   | 6.46 (+/- 3.44)  | 8.64 (+/- 3.12)   | 6.39 (+/- 2.51)  | p=0.021              |
| Mean microvillus height (+/- SD) (microns)                                      | 0.28 (+/- 0.08)  | 0.34 (+/- 0.08)   | 0.33 (+/-0.07)   | p=0.021              |
| Mean density of microvilli per canaliculi (+/- SD) (# of microvilli/ micron)    | 3.90 (+/- 0.84)  | 4.16 (+/- 0.94)   | 4.39 (+/-0.78)   | p=0.16               |
| Mean number of microvilli per canaliculus (+/- SD)                              | 12.40 (+/- 7.52) | 16.00 (+/- 10.79) | 11.94 (+/- 6.06) | p=0.20               |
| <b>Space of Disse</b>                                                           |                  |                   |                  |                      |
| Mean width of space of Disse (+/- SD) (microns)                                 | 0.68 (+/-0.32)   | 0.76 (+/- 0.34)   | 0.60 (+/- 0.19)  | p=0.35               |
| Mean canalicular height (+/-SD) (microns)                                       | 0.27 (+/-0.10)   | 0.31 (+/- 0.13)   | 0.38 (+/- 0.10)  | p=0.024              |
| Mean density of microvilli in space of Disse (+/- SD) (# of microvilli/ micron) | 2.78 (+/- 1.52)  | 2.35 (+/- 1.74)   | 3.08 (+/- 0.75)  | p=0.38               |
| <b>Miscellaneous</b>                                                            |                  |                   |                  |                      |
| Mean number of high density lesions in mitochondria per hepatocyte (+/- SD)     | 1.58 (+/- 0.88)  | 1.43 (+/- 0.68)   | 0.42 (+/- 0.52)  | p<0.001              |
